# Supplementary material
Source: Springer Nature journal article supplement (https://www.springermedizin.de/resource/supplementary/12882_2013_924_MOESM6_ESM.pdf/9454040)
Supplement: MOESM6 [file 9454040]

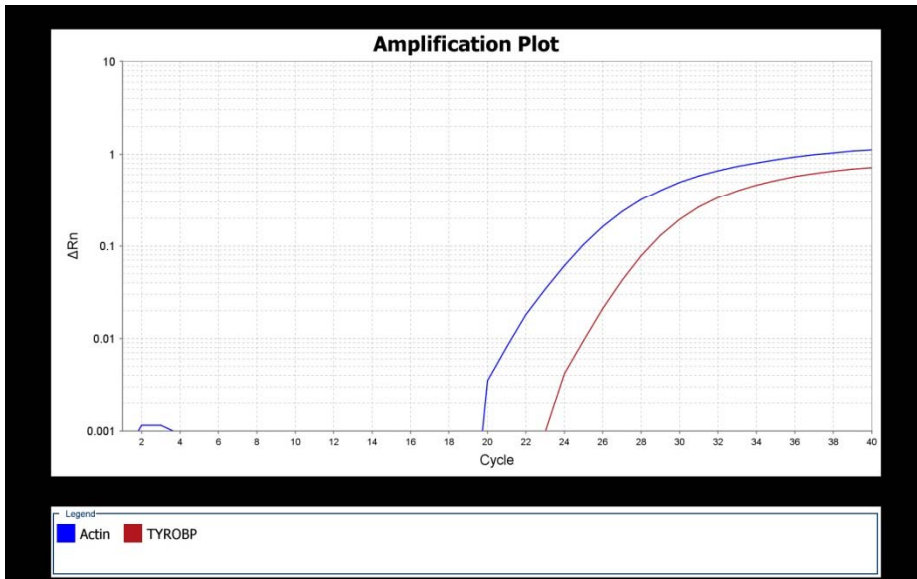

**2 h normoxia**

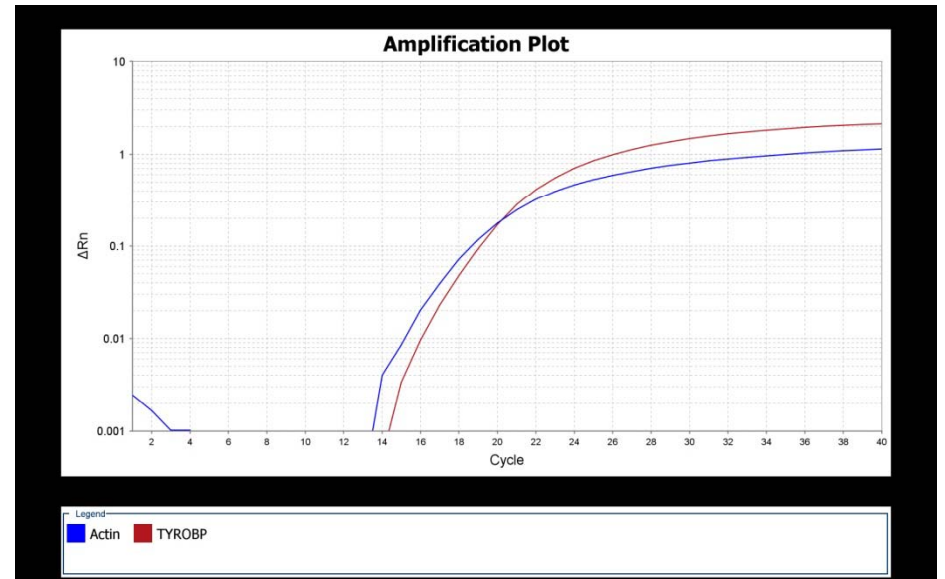

**2 h hypoxia**

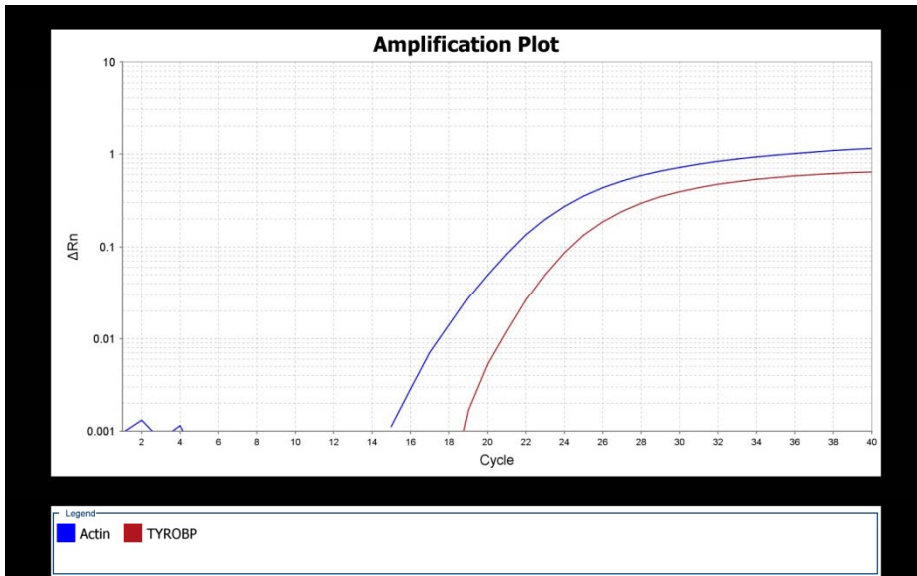

**2 h normoxia +  
24 h recovery**

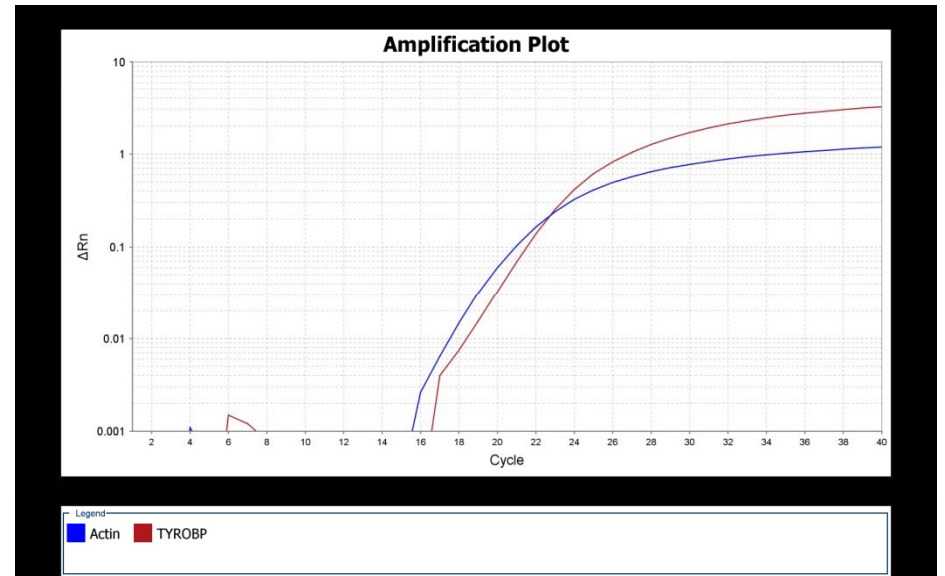

**2 h hypoxia +  
24 h recovery**
